# Supplementary material for: Ethephon-Induced Ethylene Enhances Protein Degradation in Source Leaves, but Its High Endogenous Level Inhibits the Development of Regenerative Organs in Brassica napus
Source: MDPI journal article supplement (doi:10.3390/plants10101993), 2021-09-23
Supplement: s1 [file s1]

**SUPPLIMENTARY TABLE S1.** Primer sequences used for qRT-PCR analysis.

| <b>Gene</b>  | <b>Accession No.</b> | <b>Forward sequence (5'-3' )</b> | <b>Reverse sequence (5'-3' )</b> |
|--------------|----------------------|----------------------------------|----------------------------------|
| CAB          | AY288914             | GGCAGCCCATGGTACGGATC             | CCTCCITCGCTGAAGATCTGT            |
| SAG12        | XM_013821610.2       | AGAGAATACCAAACCAAACCGAA          | GCAACTCCCAAAATCTCAGGG            |
| AAP1         | AY188953.1           | TGCTTACGCCACGGTTCTCA             | GCTGCGCGAACACCTGATAG             |
| AAP2         | AY188954.1           | CGGTACTGTTTGGACCGCAA             | GACACGGGTCTTTTCCTCCG             |
| AAP4         | AY188955.1           | CGCTGGACCTGCAGTGATGT             | CCGCTCTCGTGAAAGCAGTTT            |
| AAP6         | AJ565848.1           | GCGGCCGTAATGTCCTTTTC             | ACCCACACACCCGCATAACA             |
| <i>ACTIN</i> | AF111812             | GATTCCGTTGCCCTGAAGTA             | GCGACCACCTTGATCTTCAT             |
